# Supplementary material
Source: PubMed Central journal article supplement (PMC6143043)
Supplement: jamadermatol-154-1066-s001.pdf [file jamadermatol-154-1066-s001.pdf]

## Supplementary Online Content

Dodds M, Arron ST, Linos E, Polcari I, Mansh MD. Characteristics and Skin Cancer Risk Behaviors of Adult Sunless Tanners in the United States. *JAMA Dermatol*. Published online July 25, 2018.  
doi:10.1001/jamadermatol.2018.2054

Supplement. eTable 1. Respondent Characteristics by Sunless Tanning, Female Respondents

eTable 2. Respondent Characteristics by Sunless Tanning, Male Respondents

eTable 3. Indoor Tanning, Skin Cancer Screening, Sunburn, and Sun Protection Behaviors by Sunless Tanning, Stratified by Sex

eTable 4. Indoor Tanning, Skin Cancer Screening, Sunburn, and Sun Protection Behaviors by Sunless Tanning Among Current Indoor Tanners, Stratified by Sex

This supplementary material has been provided by the authors to give readers additional information about their work.

**eTable 1. Respondent Characteristics by Sunless Tanning, Female Respondents**

| Variable                               | Unweighted Sample Size <sup>a</sup> (N=14,662) | Weighted Prevalence of Sunless Tanning <sup>b</sup> % (SE) | Adjusted Prevalence Odds Ratio, aPOR (95% CI) <sup>c</sup> | p-value |
|----------------------------------------|------------------------------------------------|------------------------------------------------------------|------------------------------------------------------------|---------|
| <b>Age</b>                             |                                                |                                                            |                                                            |         |
| 18-35 years                            | 4,284                                          | 14.0 (0.8)                                                 | 1.0 (Reference)                                            |         |
| 36-50 years                            | 3,578                                          | 11.0 (0.7)                                                 | 0.73 (0.60-0.87)                                           | 0.001   |
| 51-65 years                            | 3,728                                          | 11.2 (0.7)                                                 | 0.65 (0.54-0.78)                                           | <0.001  |
| >65 years                              | 3,072                                          | 7.1 (0.7)                                                  | 0.38 (0.30-0.48)                                           | <0.001  |
| <b>Race/Ethnicity</b>                  |                                                |                                                            |                                                            |         |
| Non-Hispanic White                     | 9,287                                          | 15.5 (0.6)                                                 | 1.0 (Reference)                                            |         |
| Hispanic                               | 2,447                                          | 5.1 (0.6)                                                  | 0.35 (0.26-0.45)                                           | <0.001  |
| Non-Hispanic Black                     | 1,968                                          | 0.9 (0.2)                                                  | 0.07 (0.04-0.12)                                           | <0.001  |
| Non-Hispanic Asian                     | 776                                            | 1.6 (0.5)                                                  | 0.08 (0.05-0.16)                                           | <0.001  |
| All Others                             | 184                                            | 5.8 (2.0)                                                  | 0.42 (0.20-0.90)                                           | 0.03    |
| <b>Region</b>                          |                                                |                                                            |                                                            |         |
| Northeast                              | 2,491                                          | 10.6 (1.0)                                                 | 1.0 (Reference)                                            |         |
| Midwest                                | 3,110                                          | 12.8 (1.0)                                                 | 1.20 (0.89-1.62)                                           | 0.24    |
| South                                  | 4,936                                          | 10.4 (0.7)                                                 | 1.14 (0.87-1.51)                                           | 0.37    |
| West                                   | 4,125                                          | 12.3 (0.8)                                                 | 1.37 (1.04-1.82)                                           | 0.03    |
| <b>Sexual Orientation</b>              |                                                |                                                            |                                                            |         |
| Heterosexual                           | 14,236                                         | 11.5 (0.4)                                                 | 1.0 (Reference)                                            |         |
| Sexual Minority                        | 426                                            | 9.0 (2.5)                                                  | 0.64 (0.34-1.21)                                           | 0.17    |
| <b>Education Level</b>                 |                                                |                                                            |                                                            |         |
| Less than High School                  | 1,782                                          | 4.8 (0.8)                                                  | 1.0 (Reference)                                            |         |
| High School or GED                     | 3,397                                          | 8.0 (0.7)                                                  | 1.25 (0.84-1.87)                                           | 0.27    |
| Some college                           | 4,931                                          | 13.0 (0.8)                                                 | 1.92 (1.32-2.80)                                           | 0.001   |
| College degree or greater              | 4,552                                          | 14.4 (0.7)                                                 | 1.88 (1.26-2.79)                                           | 0.002   |
| <b>Body Mass Index</b>                 |                                                |                                                            |                                                            |         |
| Underweight                            | 996                                            | 13.5 (1.6)                                                 | 0.95 (0.70-1.28)                                           | 0.72    |
| Normal Weight                          | 4,669                                          | 13.8 (0.8)                                                 | 1.0 (Reference)                                            |         |
| Overweight                             | 4,084                                          | 11.7 (0.7)                                                 | 0.95 (0.79-1.14)                                           | 0.58    |
| Obese                                  | 4,913                                          | 8.2 (0.5)                                                  | 0.64 (0.53-0.77)                                           | <0.001  |
| <b>Sun Sensitivity</b>                 |                                                |                                                            |                                                            |         |
| No Sunburn                             | 5,969                                          | 5.8 (0.5)                                                  | 1.0 (Reference)                                            |         |
| Mild Sunburn                           | 3,768                                          | 16.1 (0.9)                                                 | 1.90 (1.52-2.39)                                           | <0.001  |
| Moderate Sunburn                       | 3,544                                          | 14.9 (0.8)                                                 | 1.67 (1.34-2.08)                                           | <0.001  |
| Severe Sunburn                         | 1,381                                          | 12.2 (1.4)                                                 | 1.33 (0.99-1.80)                                           | 0.06    |
| <b>Family History of Skin Cancer</b>   |                                                |                                                            |                                                            |         |
| No                                     | 13,408                                         | 10.8 (0.4)                                                 | 1.0 (Reference)                                            |         |
| Yes                                    | 1,254                                          | 18.2 (1.5)                                                 | 1.32 (1.05-1.67)                                           | 0.02    |
| <b>Personal History of Skin Cancer</b> |                                                |                                                            |                                                            |         |
| No                                     | 14,628                                         | 11.2 (0.4)                                                 | 1.0 (Reference)                                            |         |
| Yes                                    | 394                                            | 17.2 (3.0)                                                 | 1.41 (0.91-2.19)                                           | 0.13    |

<sup>a</sup> Unweighted sample sizes for reference

<sup>b</sup> Sunless tanning was defined as self-reported use of (1) spray-on or mist tans at a tanning salon, or (2) self-applied sunless or fake tanning products in the last 12 months.

<sup>6</sup> Adjusted prevalence odds ratios calculated using multivariate logistic regression analyses controlling for age (categorical), sex, race/ethnicity, region, sexual orientation, education level, body mass index, sun sensitivity, family history of skin cancer in a first degree relative, and personal history of skin cancer.

**eTable 2. Respondent Characteristics by Sunless Tanning, Male Respondents**

| Variable                               | Unweighted Sample Size <sup>a</sup> (N=12,691) | Weighted Prevalence of Sunless Tanning <sup>b</sup> % (SE) | Adjusted Prevalence Odds Ratio, aPOR (95% CI) <sup>c</sup> | p-value |
|----------------------------------------|------------------------------------------------|------------------------------------------------------------|------------------------------------------------------------|---------|
| <b>Age</b>                             |                                                |                                                            |                                                            |         |
| 18-35 years                            | 3,722                                          | 1.4 (0.3)                                                  | 1.0 (Reference)                                            |         |
| 36-50 years                            | 3,153                                          | 1.7 (0.3)                                                  | 1.37 (0.84-2.22)                                           | 0.21    |
| 51-65 years                            | 3,291                                          | 0.9 (0.2)                                                  | 0.61 (0.32-1.18)                                           | 0.14    |
| >65 years                              | 2,525                                          | 0.7 (0.2)                                                  | 0.44 (0.18-1.03)                                           | 0.06    |
| <b>Race/Ethnicity</b>                  |                                                |                                                            |                                                            |         |
| Non-Hispanic White                     | 8,330                                          | 1.5 (0.2)                                                  | 1.0 (Reference)                                            |         |
| Hispanic                               | 2,041                                          | 1.0 (0.3)                                                  | 0.65 (0.30-1.40)                                           | 0.27    |
| Non-Hispanic Black                     | 1,399                                          | 0.2 (0.2)                                                  | 0.17 (0.03-1.31)                                           | 0.09    |
| Non-Hispanic Asian                     | 757                                            | 0.4 (0.2)                                                  | 0.25 (0.06-1.03)                                           | 0.06    |
| All Others                             | 164                                            | 0.0 (0.0)                                                  | ----                                                       | ----    |
| <b>Region</b>                          |                                                |                                                            |                                                            |         |
| Northeast                              | 2,018                                          | 1.2 (0.3)                                                  | 1.0 (Reference)                                            |         |
| Midwest                                | 2,818                                          | 1.0 (0.2)                                                  | 0.79 (0.37-1.69)                                           | 0.54    |
| South                                  | 4,076                                          | 1.3 (0.3)                                                  | 1.18 (0.58-2.38)                                           | 0.65    |
| West                                   | 3,779                                          | 1.3 (0.3)                                                  | 1.01 (0.45-2.24)                                           | 0.99    |
| <b>Sexual Orientation</b>              |                                                |                                                            |                                                            |         |
| Heterosexual                           | 12,350                                         | 1.1 (0.1)                                                  | 1.0 (Reference)                                            |         |
| Sexual Minority                        | 341                                            | 8.0 (2.0)                                                  | 7.29 (4.15-12.78)                                          | <0.001  |
| <b>Education Level</b>                 |                                                |                                                            |                                                            |         |
| Less than High School                  | 1,677                                          | 0.9 (0.4)                                                  | 1.0 (Reference)                                            |         |
| High School or GED                     | 3,226                                          | 1.3 (0.3)                                                  | 1.24 (0.45-3.37)                                           | 0.68    |
| Some college                           | 3,864                                          | 1.2 (0.3)                                                  | 1.10 (0.39-3.08)                                           | 0.86    |
| College degree or greater              | 3,924                                          | 1.3 (0.1)                                                  | 0.98 (0.38-2.57)                                           | 0.97    |
| <b>Body Mass Index</b>                 |                                                |                                                            |                                                            |         |
| Underweight                            | 375                                            | 1.2 (0.7)                                                  | 0.64 (0.17-2.41)                                           | 0.51    |
| Normal Weight                          | 3,337                                          | 1.7 (0.3)                                                  | 1.0 (Reference)                                            |         |
| Overweight                             | 5,047                                          | 1.2 (0.2)                                                  | 0.74 (0.43-1.26)                                           | 0.26    |
| Obese                                  | 3,932                                          | 0.9 (0.2)                                                  | 0.58 (0.31-1.10)                                           | 0.09    |
| <b>Sun Sensitivity</b>                 |                                                |                                                            |                                                            |         |
| No Sunburn                             | 6,050                                          | 0.8 (0.2)                                                  | 1.0 (Reference)                                            |         |
| Mild Sunburn                           | 3,137                                          | 1.4 (0.3)                                                  | 1.70 (0.79-3.65)                                           | 0.17    |
| Moderate Sunburn                       | 2,766                                          | 1.7 (0.4)                                                  | 1.48 (0.86-2.54)                                           | 0.16    |
| Severe Sunburn                         | 738                                            | 2.0 (0.7)                                                  | 1.31 (0.73-2.36)                                           | 0.37    |
| <b>Family History of Skin Cancer</b>   |                                                |                                                            |                                                            |         |
| No                                     | 11,775                                         | 1.2 (0.1)                                                  | 1.0 (Reference)                                            |         |
| Yes                                    | 916                                            | 2.4 (0.8)                                                  | 1.66 (0.75-3.70)                                           | 0.21    |
| <b>Personal History of Skin Cancer</b> |                                                |                                                            |                                                            |         |
| No                                     | 12,219                                         | 1.2 (0.1)                                                  | 1.0 (Reference)                                            |         |
| Yes                                    | 472                                            | 1.7 (0.8)                                                  | 1.41 (0.47-4.20)                                           | 0.54    |

<sup>a</sup> Unweighted sample sizes for reference

<sup>b</sup> Sunless tanning was defined as self-reported use of (1) spray-on or mist tans at a tanning salon, or (2) self-applied sunless or fake tanning products in the last 12 months.

<sup>6</sup> Adjusted prevalence odds ratios calculated using multivariate logistic regression analyses controlling for age (categorical), sex, race/ethnicity, region, sexual orientation, education level, body mass index, sun sensitivity, family history of skin cancer in a first degree relative, and personal history of skin cancer.

**eTable 3. Indoor Tanning, Skin Cancer Screening, Sunburn, and Sun Protection Behaviors by Sunless Tanning, Stratified by Sex**

|                                          | Female (N=14,662) <sup>a</sup>                     |                                        |                      | Male (N=12,690) <sup>a</sup>                       |                                      |                      |
|------------------------------------------|----------------------------------------------------|----------------------------------------|----------------------|----------------------------------------------------|--------------------------------------|----------------------|
|                                          | Sunless Tanning in the Last 12 Months <sup>b</sup> |                                        |                      | Sunless Tanning in the Last 12 Months <sup>b</sup> |                                      |                      |
| Variable                                 | None (N=13,166) <sup>a</sup>                       | Sunless Tanners (N=1,496) <sup>a</sup> | p-value <sup>c</sup> | None (N=12,550) <sup>a</sup>                       | Sunless Tanners (N=140) <sup>a</sup> | p-value <sup>c</sup> |
| <b>Indoor Tanning (Ever)</b>             |                                                    |                                        |                      |                                                    |                                      |                      |
| Weighted % (SE)                          | 22.2 (0.5)                                         | 59.1 (1.7)                             | <0.001               | 9.4 (0.4)                                          | 49.5 (5.6)                           | <0.001               |
| aPOR (95% CI) <sup>d</sup>               | 1.0 (Ref)                                          | 3.38 (2.85-3.99)                       | <0.001               | 1.0 (Ref)                                          | 7.99 (4.88-13.08)                    | <0.001               |
| <b>Indoor Tanning (Last 12 months)</b>   |                                                    |                                        |                      |                                                    |                                      |                      |
| Weighted % (SE)                          | 4.3 (0.3)                                          | 18.0 (1.4)                             | <0.001               | 1.4 (0.1)                                          | 26.7 (4.7)                           | <0.001               |
| aPOR (95% CI) <sup>d</sup>               | 1.0 (Ref)                                          | 3.29 (2.55-4.25)                       | <0.001               | 1.0 (Ref)                                          | 22.67 (13.1-39.2)                    | <0.001               |
| <b>Skin Examination (Ever)</b>           |                                                    |                                        |                      |                                                    |                                      |                      |
| Weighted % (SE)                          | 23.7 (0.5)                                         | 39.5 (1.7)                             | <0.001               | 20.8 (0.5)                                         | 35.3 (5.3)                           | <0.001               |
| aPOR (95% CI) <sup>d</sup>               | 1.0 (Ref)                                          | 1.71 (1.44-2.05)                       | <0.001               | 1.0 (Ref)                                          | 2.13 (1.24-3.67)                     | 0.01                 |
| <b>Skin Examination (Last 24 months)</b> |                                                    |                                        |                      |                                                    |                                      |                      |
| Weighted % (SE)                          | 14.1 (0.4)                                         | 23.6 (1.5)                             | <0.001               | 12.5 (0.4)                                         | 20.9 (4.1)                           | 0.02                 |
| aPOR (95% CI) <sup>d</sup>               | 1.0 (Ref)                                          | 1.53 (1.25-1.89)                       | <0.001               | 1.0 (Ref)                                          | 1.73 (1.01-2.95)                     | 0.048                |
| <b>Sunburn (Last 12 months)</b>          |                                                    |                                        |                      |                                                    |                                      |                      |
| Weighted % (SE)                          | 34.4 (0.6)                                         | 58.0 (1.8)                             | <0.001               | 36.5 (0.7)                                         | 61.8 (4.7)                           | <0.001               |
| aPOR (95% CI) <sup>d</sup>               | 1.0 (Ref)                                          | 1.54 (1.29-1.84)                       | <0.001               | 1.0 (Ref)                                          | 2.05 (1.28-3.30)                     | 0.003                |
| <b>Sunscreen Use</b>                     |                                                    |                                        |                      |                                                    |                                      |                      |
| Behavioral score, mean (SE) <sup>e</sup> | 3.1 (0.02)                                         | 3.6 (0.05)                             | <0.001               | 2.4 (0.02)                                         | 3.1 (0.2)                            | 0.001                |
| Coefficient (95% CI) <sup>d</sup>        | 0.0 (Ref)                                          | 0.16 (0.06 to 0.26)                    | 0.002                | 0.0 (Ref)                                          | 0.42 (0.09 to 0.75)                  | 0.01                 |
| <b>Shade</b>                             |                                                    |                                        |                      |                                                    |                                      |                      |
| Behavioral score, mean (SE) <sup>e</sup> | 3.3 (0.01)                                         | 3.1 (0.03)                             | <0.001               | 3.0 (0.02)                                         | 3.0 (0.1)                            | 0.59                 |
| Coefficient (95% CI) <sup>d</sup>        | 0.0 (Ref)                                          | -0.10 (-0.17 to -0.03)                 | 0.007                | 0.0 (Ref)                                          | 0.03 (-0.20 to 0.27)                 | 0.79                 |
| <b>Long Pants</b>                        |                                                    |                                        |                      |                                                    |                                      |                      |
| Behavioral score, mean (SE) <sup>e</sup> | 2.3 (0.02)                                         | 2.0 (0.04)                             | <0.001               | 2.6 (0.02)                                         | 2.3 (0.13)                           | 0.01                 |
| Coefficient (95% CI) <sup>d</sup>        | 0.0 (Ref)                                          | -0.17 (-0.24 to -0.09)                 | <0.001               | 0.0 (Ref)                                          | -0.26 (-0.51 to -0.02)               | 0.04                 |
| <b>Long Sleeves</b>                      |                                                    |                                        |                      |                                                    |                                      |                      |
| Behavioral score, mean (SE) <sup>e</sup> | 1.9 (0.02)                                         | 1.7 (0.04)                             | <0.001               | 2.0 (0.02)                                         | 2.0 (0.1)                            | 0.75                 |
| Coefficient (95% CI) <sup>d</sup>        | 0.0 (Ref)                                          | -0.13 (-0.21 to -0.06)                 | 0.001                | 0.0 (Ref)                                          | 0.12 (-0.15 to 0.38)                 | 0.39                 |
| <b>Wide Brimmed Hat</b>                  |                                                    |                                        |                      |                                                    |                                      |                      |
| Behavioral score, mean (SE) <sup>e</sup> | 1.9 (0.02)                                         | 1.8 (0.04)                             | 0.25                 | 1.9 (0.02)                                         | 1.8 (0.2)                            | 0.64                 |
| Coefficient (95% CI) <sup>d</sup>        | 0.0 (Ref)                                          | 0.00 (-0.09 to 0.09)                   | 0.99                 | 0.0 (Ref)                                          | -0.02 (-0.33 to 0.29)                | 0.89                 |

<sup>a</sup> Unweighted sample sizes for reference

<sup>b</sup> Sunless tanning was defined as self-reported use of (1) spray-on or mist tans at a tanning salon, or (2) self-applied sunless or fake tanning products in the last 12 months.

<sup>c</sup> Statistical significance calculated using Wald-adjusted Pearson's Chi Square tests (weighted percentages), Wald-adjusted t-tests (mean behavioral scores), multivariate adjusted logistic regression (adjusted prevalence odds ratios), or multivariate adjusted linear regression (coefficients).

<sup>d</sup> Adjusted prevalence odds ratios and regression coefficients calculated using logistic regression and linear regression analyses, respectively, controlling for age (continuous), sex, race/ethnicity, region, sexual orientation, education level, body mass index, sun sensitivity, family history of skin cancer in a first degree relative, and personal history of skin cancer.

<sup>e</sup> Weighted mean behavioral scores. Individual participants were assigned a behavioral score between 1 (never use) and 5 (always use) based on a Likert scale for self-reported use of each sun protection method when outdoors on a sunny day for more than 1 hour.

**eTable 4. Indoor Tanning, Skin Cancer Screening, Sunburn, and Sun Protection Behaviors by Sunless Tanning Among Current Indoor Tanners, Stratified by Sex**

|                                          | Female (N=14,662) <sup>a</sup>                     |                                      |                      | Male (N=12,690) <sup>a</sup>                       |                                     |                      |
|------------------------------------------|----------------------------------------------------|--------------------------------------|----------------------|----------------------------------------------------|-------------------------------------|----------------------|
|                                          | Sunless Tanning in the Last 12 Months <sup>b</sup> |                                      |                      | Sunless Tanning in the Last 12 Months <sup>b</sup> |                                     |                      |
| Variable                                 | None (N=545) <sup>a</sup>                          | Sunless Tanners (N=267) <sup>a</sup> | p-value <sup>c</sup> | None (N=176) <sup>a</sup>                          | Sunless Tanners (N=35) <sup>a</sup> | p-value <sup>c</sup> |
| Indoor Tanning Frequency                 |                                                    |                                      |                      |                                                    |                                     |                      |
| Mean (SE)                                | 16.4 (1.4)                                         | 19.2 (2.0)                           | 0.25                 | 10.3 (1.4)                                         | 19.1 (5.5)                          | 0.12                 |
| Skin Examination (Ever)                  |                                                    |                                      |                      |                                                    |                                     |                      |
| Weighted % (SE)                          | 23.3 (2.6)                                         | 22.5 (3.1)                           | 0.85                 | 23.7 (4.5)                                         | 43.9 (10.8)                         | 0.12                 |
| aPOR (95% CI) <sup>d</sup>               | 1.0 (Ref)                                          | 1.17 (0.70-1.96)                     | 0.55                 | 1.0 (Ref)                                          | 4.89 (1.30-18.39)                   | 0.02                 |
| Skin Examination (Last 24 months)        |                                                    |                                      |                      |                                                    |                                     |                      |
| Weighted % (SE)                          | 15.9 (2.4)                                         | 12.9 (2.5)                           | 0.39                 | 16.5 (4.0)                                         | 17.6 (7.2)                          | 0.89                 |
| aPOR (95% CI) <sup>d</sup>               | 1.0 (Ref)                                          | 0.90 (0.50-1.62)                     | 0.72                 | 1.0 (Ref)                                          | 1.28 (0.29-5.68)                    | 0.74                 |
| Sunburn (Last 12 months)                 |                                                    |                                      |                      |                                                    |                                     |                      |
| Weighted % (SE)                          | 54.6 (2.8)                                         | 63.8 (4.0)                           | 0.07                 | 64.6 (4.8)                                         | 64.2 (9.8)                          | 0.98                 |
| aPOR (95% CI) <sup>d</sup>               | 1.0 (Ref)                                          | 1.18 (0.72-1.96)                     | 0.51                 | 1.0 (Ref)                                          | 0.87 (0.31-2.46)                    | 0.79                 |
| Sunscreen Use                            |                                                    |                                      |                      |                                                    |                                     |                      |
| Behavioral score, mean (SE) <sup>e</sup> | 2.9 (0.1)                                          | 3.1 (0.1)                            | 0.31                 | 2.6 (0.2)                                          | 3.0 (0.3)                           | 0.31                 |
| Coefficient (95% CI) <sup>d</sup>        | 0.0 (Ref)                                          | 0.03 (-0.26 to 0.31)                 | 0.18                 | 0.0 (Ref)                                          | 0.61 (-0.13 to 1.35)                | 0.11                 |
| Shade                                    |                                                    |                                      |                      |                                                    |                                     |                      |
| Behavioral score, mean (SE) <sup>e</sup> | 2.7 (0.05)                                         | 2.6 (0.08)                           | 0.68                 | 2.6 (0.1)                                          | 2.7 (0.2)                           | 0.82                 |
| Coefficient (95% CI) <sup>d</sup>        | 0.0 (Ref)                                          | -0.10 (-0.28 to 0.09)                | 0.32                 | 0.0 (Ref)                                          | 0.07 (-0.38 to 0.52)                | 0.76                 |
| Long Pants                               |                                                    |                                      |                      |                                                    |                                     |                      |
| Behavioral score, mean (SE) <sup>e</sup> | 1.6 (0.06)                                         | 1.6 (0.08)                           | 0.99                 | 2.2 (0.1)                                          | 2.0 (0.2)                           | 0.3                  |
| Coefficient (95% CI) <sup>d</sup>        | 0.0 (Ref)                                          | 0.03 (-0.15 to 0.21)                 | 0.78                 | 0.0 (Ref)                                          | -0.35 (-0.79 to 0.10)               | 0.13                 |
| Long Sleeves                             |                                                    |                                      |                      |                                                    |                                     |                      |
| Behavioral score, mean (SE) <sup>e</sup> | 1.3 (0.04)                                         | 1.3 (0.05)                           | 0.32                 | 1.6 (0.1)                                          | 1.6 (0.2)                           | 0.95                 |
| Coefficient (95% CI) <sup>d</sup>        | 0.0 (Ref)                                          | -0.08 (-0.19 to 0.03)                | 0.15                 | 0.0 (Ref)                                          | 0.07 (-0.31 to 0.44)                | 0.73                 |
| Wide Brimmed Hat                         |                                                    |                                      |                      |                                                    |                                     |                      |
| Behavioral score, mean (SE) <sup>e</sup> | 1.4 (0.05)                                         | 1.5 (0.08)                           | 0.33                 | 1.5 (0.1)                                          | 1.6 (0.2)                           | 0.55                 |
| Coefficient (95% CI) <sup>d</sup>        | 0.0 (Ref)                                          | 0.09 (-0.11 to 0.30)                 | 0.35                 | 0.0 (Ref)                                          | 0.13 (-0.32 to 0.58)                | 0.57                 |

<sup>a</sup> Unweighted sample sizes for reference

<sup>b</sup> Sunless tanning was defined as self-reported use of (1) spray-on or mist tans at a tanning salon, or (2) self-applied sunless or fake tanning products in the last 12 months.

<sup>c</sup> Statistical significance calculated using Wald-adjusted Pearson's Chi Square tests (weighted percentages), Wald-adjusted t-tests (mean behavioral scores), multivariate adjusted logistic regression (adjusted prevalence odds ratios), or multivariate adjusted linear regression (coefficients).

<sup>d</sup> Adjusted prevalence odds ratios and regression coefficients calculated using logistic regression and linear regression analyses, respectively, controlling for age (continuous), sex, race/ethnicity, region, sexual orientation, education level, body mass index, sun sensitivity, family history of skin cancer in a first degree relative, and personal history of skin cancer.

<sup>e</sup> Weighted mean behavioral scores. Individual participants were assigned a behavioral score between 1 (never use) and 5 (always use) based on a Likert scale for self-reported use of each sun protection method when outdoors on a sunny day for more than 1 hour.
